# Supplementary material for: The Characteristics of Social Network Structure in Later Life in Relation to Incidence of Mild Cognitive Impairment and Conversion to Probable Dementia
Source: PubMed Central journal article supplement — J Alzheimers Dis. 2021 May 18;81(2):699–710. doi: 10.3233/JAD-201196 (PMC8203242; doi:10.3233/jad-201196), 2021-05-18
Supplement: jad-81-jad201196-s001.pdf [file jad-81-jad201196-s001.pdf]

# Supplementary Material

## The Characteristics of Social Network Structure in Later Life in Relation to Incidence of Mild Cognitive Impairment and Conversion to Probable Dementia

**Supplementary Table 1.** Baseline demographic characteristics of eligible respondents accounting for survey design

| Characteristic                                            | N (%)               | Weighted N (%)            | SE of Weighted Frequency (%) |
|-----------------------------------------------------------|---------------------|---------------------------|------------------------------|
| <b>Female sex</b>                                         | 3,551 (58.42)       | 16,056,597 (56.37)        | 347,269 (0.78)               |
| <b>Education</b>                                          |                     |                           |                              |
| Less than high school                                     | 1,585 (26.32)       | 5,846,596 (20.73)         | 274,404 (0.89)               |
| High school graduate or equivalent                        | 3,088 (51.27)       | 15,013,666 (53.23)        | 447,534 (1.03)               |
| College graduate or beyond                                | 1,350 (22.41)       | 7,343,341 (26.04)         | 337,025 (1.18)               |
| <b>Race/ethnicity</b>                                     |                     |                           |                              |
| Non-Hispanic white                                        | 4,193 (68.99)       | 23,142,025 (81.25)        | 596,005 (0.86)               |
| Non-Hispanic black                                        | 1,316 (21.65)       | 2,296,069 (8.06)          | 109,054 (0.43)               |
| Hispanic                                                  | 353 (5.81)          | 1,851,640 (6.50)          | 147,420 (0.55)               |
| Other minorities                                          | 216 (3.55)          | 1,192,168 (4.18)          | 145,361 (0.50)               |
| <b>Social network structure</b>                           |                     |                           |                              |
| Having at least one family member within a social network | 4,942 (81.66)       | 23,653,455 (83.38)        | 487,194 (0.62)               |
| Having at least one friend within a social network        | 1,059 (17.50)       | 5,485,162 (19.34)         | 244,393 (0.78)               |
| Having at least one family member within a social network | 1,820 (30.07)       | 9,145,376 (32.24)         | 316,538 (1.04)               |
| <b>Total</b>                                              | 6,078 (100.00)      | 28,481,902 (100.00)       | 542,820                      |
|                                                           | <b>Mean (SD), N</b> | <b>Weighted Mean (SD)</b> |                              |
| <b>Age at baseline</b>                                    | 77.49 (7.79), 6,078 | 75.11 (0.10)              |                              |
| <b>Follow-up time (y)</b>                                 | 4.72 (1.61), 6,078  | 4.80 (0.03)               |                              |
| <b>Social network size</b>                                | 1.93 (1.29), 5,709  | 1.98 (0.03)               |                              |
| <b>Number of family members within a social network</b>   | 1.51 (1.21), 6,052  | 1.54 (0.02)               |                              |
| <b>Number of friends within a social network</b>          | 0.25 (0.61), 6,052  | 0.28 (0.01)               |                              |

The analytic sample includes NHATS respondents who had at least two waves of cognitive status during the follow-up period of 2011-2016. SE, Standard error. Weighted estimates are calculated accounting for complex NHATS survey designs of weights, strata, and clusters.

**Supplementary Table 2.** Annual cognitive transition rates

| <b>Previous status</b> | <b>Latter status</b>   | <b>Transition rate /1,000 person-year with<br/>[95% Confidence Interval]</b> |
|------------------------|------------------------|------------------------------------------------------------------------------|
| Cognitively unimpaired | MCI                    | 41.0 [35.5, 47.3]                                                            |
| MCI                    | Cognitively unimpaired | 0.004 [1.9e-51, 1.1e+46]                                                     |
| MCI                    | Probable dementia      | 241.3 [189.6, 307.0]                                                         |
| Cognitively unimpaired | Probable dementia      | 51.7 [46.6, 57.3]                                                            |
| Cognitively unimpaired | Death                  | 5.6 [3.4, 9.1]                                                               |
| MCI                    | Death                  | 135.7 [98.8, 186.5]                                                          |
| Probable dementia      | Death                  | 176.8 [156.1, 200.2]                                                         |

Numbers expressed as transition rate /1,000 person-year with [95% Confidence Interval].

**Supplementary Table 3.** Adjusted Hazard Ratios of demographic characteristics on cognitive decline in the multi-state survival model for social network size

| Transition                     | Baseline Age<br>[95% CIs]   | Male<br>[95% CIs] <sup>1</sup> | High School Graduate<br>[95% CIs] <sup>2</sup> | College Graduate<br>[95% CIs] <sup>2</sup> | Non-Hispanic black<br>[95% CIs] <sup>3</sup> | Hispanic<br>[95% CIs] <sup>3</sup> | Other Minorities<br>[95% CIs] <sup>3</sup> | Social network size<br>[95% CIs] <sup>4</sup> |
|--------------------------------|-----------------------------|--------------------------------|------------------------------------------------|--------------------------------------------|----------------------------------------------|------------------------------------|--------------------------------------------|-----------------------------------------------|
| Unimpaired - MCI               | <b>1.17</b><br>[1.14, 1.19] | 1.15<br>[0.89, 1.48]           | <b>0.26</b><br>[0.19, 0.35]                    | <b>0.19</b><br>[0.13, 0.28]                | <b>2.39</b><br>[1.79, 3.20]                  | <b>2.81</b><br>[1.70, 4.63]        | <b>1.89</b><br>[1.04, 3.46]                | 0.92<br>[0.82, 1.03]                          |
| Unimpaired - Probable dementia | <b>1.14</b><br>[1.12, 1.16] | <b>1.31</b><br>[1.01, 1.69]    | <b>0.43</b><br>[0.32, 0.58]                    | <b>0.27</b><br>[0.18, 0.41]                | <b>1.41</b><br>[1.01, 1.96]                  | <b>2.32</b><br>[1.55, 3.49]        | <b>1.88</b><br>[1.00, 3.51]                | 0.95<br>[0.86, 1.06]                          |
| Unimpaired - Death             | 1.01<br>[0.97, 1.06]        | 1.03<br>[0.56, 1.87]           | 0.75<br>[0.36, 1.55]                           | 0.43<br>[0.17, 1.11]                       | 0.45<br>[0.12, 1.69]                         | 5.4e-05<br>[9.4e-71, 3.11e61]      | 0.46<br>[0.004, 48.33]                     | 1.03<br>[0.83, 1.28]                          |
| MCI - Unimpaired               | <b>1.16</b><br>[1.11, 1.21] | 1.34<br>[0.77, 2.32]           | <b>0.06</b><br>[0.01, 0.25]                    | 7.7e-06<br>[8.5e-70, 6.9e-58]              | 1.28<br>[0.67, 2.46]                         | 2.40<br>[0.97, 5.93]               | 0.07<br>[3.5e-05, 138.47]                  | 1.26<br>[0.98, 1.62]                          |
| MCI - Probable dementia        | 1.02<br>[0.99, 1.05]        | 0.67<br>[0.41, 1.09]           | 1.61<br>[0.92, 2.81]                           | 1.62<br>[0.84, 3.13]                       | 0.62<br>[0.34, 1.12]                         | 0.71<br>[0.25, 2.03]               | 0.46<br>[0.15, 1.42]                       | <b>0.82</b><br>[0.67, 0.99]                   |
| MCI - Death                    | 0.98<br>[0.94, 1.02]        | <b>2.09</b><br>[1.14, 3.84]    | <b>2.08</b><br>[1.04, 4.17]                    | 2.37<br>[0.10, 5.60]                       | 1.10<br>[0.49, 2.47]                         | 0.64<br>[0.19, 2.14]               | 1.55<br>[0.39, 6.10]                       | 1.13<br>[0.91, 1.42]                          |
| Probable dementia - Death      | <b>1.07</b><br>[1.04, 1.09] | 1.29<br>[0.96, 1.73]           | 1.06<br>[0.78, 1.44]                           | 0.74<br>[0.45, 1.23]                       | 0.98<br>[0.70, 1.38]                         | 0.57<br>[0.32, 1.01]               | 0.33<br>[0.07, 1.49]                       | 1.04<br>[0.92, 1.17]                          |

Adjusted Hazard Ratios [95% confidence interval] are estimated by our multi-state survival model accounting for baseline age, gender, education, race/ethnicity, and social network size of the respondents.

<sup>1</sup> Compared to females.

<sup>2</sup> Compared to respondents having less than a high school diploma.

<sup>3</sup> Compared to Non-Hispanic whites.

<sup>4</sup> Compared to respondents having one less social network member.

**Supplementary Table 4.** Adjusted Hazard Ratios of demographic characteristics on cognitive decline in the multi-state survival model for having at least one friend within a social network

| Transition                            | Baseline Age<br>[95% CIs]   | Male<br>[95% CIs] <sup>1</sup> | High School Graduate<br>[95% CIs] <sup>2</sup> | College Graduate<br>[95% CIs] <sup>2</sup> | Non-Hispanic black<br>[95% CIs] <sup>3</sup> | Hispanic<br>[95% CIs] <sup>3</sup> | Other Minorities<br>[95% CIs] <sup>3</sup> | Having at least one friend within a social network<br>[95% CIs] <sup>4</sup> |
|---------------------------------------|-----------------------------|--------------------------------|------------------------------------------------|--------------------------------------------|----------------------------------------------|------------------------------------|--------------------------------------------|------------------------------------------------------------------------------|
| <b>Unimpaired - MCI</b>               | <b>1.16</b><br>[1.14, 1.18] | 1.27<br>[0.99, 1.63]           | <b>0.28</b><br>[0.21, 0.39]                    | <b>0.18</b><br>[0.12, 0.27]                | <b>2.36</b><br>[1.75, 3.17]                  | <b>3.31</b><br>[1.99, 5.50]        | <b>2.73</b><br>[1.67, 4.46]                | 1.01<br>[0.73, 1.41]                                                         |
| <b>Unimpaired - Probable dementia</b> | <b>1.14</b><br>[1.12, 1.16] | 1.04<br>[0.85, 1.27]           | <b>0.47</b><br>[0.37, 0.60]                    | <b>0.34</b><br>[0.25, 0.47]                | <b>1.67</b><br>[1.31, 2.13]                  | <b>2.10</b><br>[1.46, 3.03]        | 1.60<br>[0.90, 2.85]                       | <b>0.48</b><br>[0.33, 0.71]                                                  |
| <b>Unimpaired - Death</b>             | 0.98<br>[0.92, 1.03]        | 1.00<br>[0.55, 1.84]           | 0.71<br>[0.32, 1.59]                           | 0.48<br>[0.18, 1.29]                       | 0.52<br>[0.16, 1.70]                         | 5.5e-05<br>[6.1e-94, 5.0e84]       | 0.001<br>[1.5e-93, 5.2e86]                 | 0.76<br>[0.32, 1.79]                                                         |
| <b>MCI - Unimpaired</b>               | <b>1.15</b><br>[1.10, 1.20] | 1.25<br>[0.72, 2.17]           | <b>0.10</b><br>[0.03, 0.37]                    | 1.6e-05<br>[1.4e-92, 1.8e-82]              | 1.22<br>[0.59, 2.50]                         | <b>3.42</b><br>[1.42, 8.22]        | 0.61<br>[0.12, 3.06]                       | 1.03<br>[0.41, 2.61]                                                         |
| <b>MCI - Probable dementia</b>        | 1.01<br>[0.98, 1.05]        | 0.71<br>[0.43, 1.19]           | 1.68<br>[0.86, 3.31]                           | 1.76<br>[0.84, 3.69]                       | 0.71<br>[0.35, 1.43]                         | 0.96<br>[0.35, 2.67]               | 0.59<br>[0.17, 2.04]                       | 0.51<br>[0.20, 1.30]                                                         |
| <b>MCI - Death</b>                    | 0.99<br>[0.95, 1.02]        | <b>2.04</b><br>[1.19, 3.48]    | <b>2.02</b><br>[1.10, 3.72]                    | 1.79<br>[0.81, 3.94]                       | 0.77<br>[0.40, 1.51]                         | 0.41<br>[0.11, 1.53]               | 1.11<br>[0.45, 2.72]                       | <b>2.58</b><br>[1.47, 4.51]                                                  |
| <b>Probable dementia - Death</b>      | <b>1.06</b><br>[1.04, 1.07] | 1.23<br>[0.96, 1.58]           | 1.27<br>[0.98, 1.65]                           | 0.97<br>[0.66, 1.42]                       | 0.97<br>[0.74, 1.28]                         | 0.66<br>[0.41, 1.05]               | <b>0.21</b><br>[0.05, 0.99]                | 0.75<br>[0.41, 1.36]                                                         |

Adjusted Hazard Ratios [95% confidence interval] are estimated by our multi-state survival model accounting for baseline age, gender, education, race/ethnicity, and whether have at least one friend within a social network.

<sup>1</sup> Compared to females.

<sup>2</sup> Compared to respondents having less than a high school diploma.

<sup>3</sup> Compared to Non-Hispanic whites.

<sup>4</sup> Compared to respondents having no friend within a social network.

**Supplementary Table 5.** Adjusted Hazard Ratios of demographic characteristics on cognitive decline in the multi-state survival model for having at least one college-educated family member within a social network

| Transition                     | Baseline Age<br>[95% CIs] | Male<br>[95% CIs] <sup>1</sup> | High School Graduate<br>[95% CIs] <sup>2</sup> | College Graduate<br>[95% CIs] <sup>2</sup> | Non-Hispanic black<br>[95% CIs] <sup>3</sup> | Hispanic<br>[95% CIs] <sup>3</sup> | Other Minorities<br>[95% CIs] <sup>3</sup> | Having at least one college-educated family member within a social network [95% CIs] <sup>4</sup> |
|--------------------------------|---------------------------|--------------------------------|------------------------------------------------|--------------------------------------------|----------------------------------------------|------------------------------------|--------------------------------------------|---------------------------------------------------------------------------------------------------|
| Unimpaired-MCI                 | 1.16<br>[1.13, 1.18]      | 1.35<br>[1.05, 1.73]           | 0.26<br>[0.19, 0.36]                           | 0.18<br>[0.13, 0.27]                       | 2.29<br>[1.72, 3.06]                         | 3.32<br>[2.07, 5.32]               | 2.63<br>[1.51, 4.58]                       | 1.06<br>[0.80, 1.39]                                                                              |
| Unimpaired – Probable dementia | 1.16<br>[1.14, 1.17]      | 0.99<br>[0.80, 1.21]           | 0.56<br>[0.45, 0.71]                           | 0.46<br>[0.33, 0.63]                       | 1.69<br>[1.35, 2.11]                         | 2.17<br>[1.52, 3.10]               | 1.43<br>[0.77, 2.65]                       | 0.37<br>[0.26, 0.51]                                                                              |
| Unimpaired - Death             | 0.99<br>[0.94, 1.04]      | 0.97<br>[0.50, 1.89]           | 0.74<br>[0.33, 1.65]                           | 0.52<br>[0.19, 1.39]                       | 0.40<br>[0.09, 1.83]                         | 4.9e-05<br>[2.4e-86, 1.0e77]       | 0.25<br>[4.0e-5, 1605.2]                   | 0.81<br>[0.41, 1.61]                                                                              |
| MCI - Unimpaired               | 1.14<br>[1.10, 1.20]      | 1.29<br>[0.75, 2.22]           | 0.09<br>[0.02, 0.34]                           | 5.3e-06<br>[3.8e-85, 7.5e+73]              | 1.16<br>[0.56, 2.37]                         | 3.20<br>[1.34, 7.62]               | 0.43<br>[0.06, 3.11]                       | 1.21<br>[0.58, 2.52]                                                                              |
| MCI - Probable dementia        | 1.01<br>[0.98, 1.05]      | 0.88<br>[0.53, 1.45]           | 1.17<br>[0.64, 2.13]                           | 1.27<br>[0.61, 2.62]                       | 0.54<br>[0.28, 1.04]                         | 0.89<br>[0.37, 2.12]               | 0.59<br>[0.17, 2.04]                       | 1.27<br>[0.58, 2.52]                                                                              |
| MCI - Death                    | 0.98<br>[0.95, 1.02]      | 1.89<br>[1.10, 3.25]           | 2.70<br>[1.45, 5.02]                           | 2.87<br>[1.30, 6.36]                       | 1.03<br>[0.53, 2.00]                         | 0.50<br>[0.16, 1.59]               | 1.12<br>[0.33, 3.88]                       | 0.75<br>[0.40, 1.39]                                                                              |
| Probable dementia - Death      | 1.06<br>[1.04, 1.08]      | 1.21<br>[0.94, 1.56]           | 1.19<br>[0.92, 1.54]                           | 0.90<br>[0.60, 1.33]                       | 0.92<br>[0.69, 1.21]                         | 0.61<br>[0.38, 0.98]               | 0.19<br>[0.04, 0.94]                       | 0.93<br>[0.68, 1.27]                                                                              |

Adjusted Hazard Ratios [95% confidence interval] are estimated by our multi-state survival model accounting for baseline age, gender, education, race/ethnicity, and whether have at least one college-educated family member within a social network.

<sup>1</sup> Compared to females.

<sup>2</sup> Compared to respondents having less than a high school diploma.

<sup>3</sup> Compared to Non-Hispanic whites.

<sup>4</sup> Compared to respondents who have no college-educated family member within a social network.
